# Supplementary material
Source: PubMed Central journal article supplement (PMC2785364)
Supplement: supp_M109.030957_jbc.M109.030957-1.pdf [file supp_M109.030957_jbc.M109.030957-1.pdf]

**SUPPLEMENTAL TABLE 1**  
**Oligonucleotides used for site directed mutagenesis**

| Mutation | Primer name    | Sequence                                |
|----------|----------------|-----------------------------------------|
| F104A    | 16B1bracMutf12 | 5'-ggtgcaggtgcttcagttgatgctg-3'         |
|          | 16B1bracMutr12 | 5'-cagcatcaactgaagcacctgcaacc-3'        |
| V106A    | 16B1bracMutf2  | 5'-ggggttcaggtkyttcaghtgatgctgatcg -3'  |
|          | 16B1bracMutr2  | 5'-cgatcagcatcadctgaarmacctgcaacccc-3'  |
| D107A    | 16B1bracMutf22 | 5'-ggttttcagttgctgctgatcgtttaag-3'      |
|          | 16B1bracMutr22 | 5'-ctaaaacgatcagcagcaactgaaaaacc-3'     |
| S181A    | 16B1bracMutf8  | 5'-gttaatgtttcatcagccactggaagcctc-3'    |
|          | 16B1bracMutr8  | 5'-gaggctccagtggtgatgaaacattaac-3'      |
| T182A    | 16B1bracMutf7  | 5'-gttaatgtttcatcatccgctggaagcctc-3'    |
|          | 16B1bracMutr7  | 5'-gaggctccagcggatgatgaaacattaac-3'     |
| L185A    | 16B1bracMutf9  | 5'-tcatcatccactggaagckccaagtatgta-3'    |
|          | 16B1bracMutr9  | 5'-tacatactggmgcttccagtggtgatgta-3'     |
| S        | 16B1bracMutf18 | 5'-tcatcatccactggaagctccaagtatgta-3'    |
|          | 16B1bracMutr18 | 5'-tacatactggagcttccagtggtgatgta-3'     |
| V        | 16B1bracMutf17 | 5'-tcatcatccactggaagcgtcaagtatgta-3'    |
|          | 16B1bracMutr17 | 5'-tacatactgacgcttccagtggtgatgta-3'     |
| K186V    | 16B1bracMutf10 | 5'-tccactggaagcctcgygtatgtatcc-3'       |
|          | 16B1bracMutr10 | 5'-ggatacatacrgaggcttccagtgga-3'        |
| L266A    | 16B1bracMutf5  | 5'-gtgaattgtttrctctgbtkyggtaaaacag-3'   |
|          | 16B1bracMutr5  | 5'-ctgtttaaccrmavcaggayaaacacaattcac-3' |
| M271A    | 16B1bracMutf13 | 5'-gttaaaacagaagcgaactacggcattgg-3'     |
|          | 16B1bracMutr13 | 5'-ccaatgccgtagtctgcttctgttttaac-3'     |
| N272A    | 16B1bracMutf14 | 5'-gttaaaacagaaatggcctacggcattgg-3'     |
|          | 16B1bracMutr14 | 5'-ccaatgccgtaggccatttctgttttaac-3'     |
| I275A    | 16B1bracMutf15 | 5'-atgaactacggcgtggaattatactgcc-3'      |
|          | 16B1bracMutr15 | 5'-ggcagtataattccagcgccttagttcat-3'     |
| V        | 16B1bracMutf16 | 5'-atgaactacggcgtggaattatactgcc-3'      |
|          | 16B1bracMutr16 | 5'-ggcagtataattccaacgccgtagtcat-3'      |

**SUPPLEMENTAL TABLE 2****Amount of protein present in enzyme assays and incubation times**

| Version     | Protein   | Time       |
|-------------|-----------|------------|
|             | <i>μg</i> | <i>min</i> |
| SalR-WT     | 0.5       | 0.5        |
| F104A       | 0.6       | 0.5        |
| V106A       | 0.6       | 0.5        |
| D107A       | 0.6       | 2.0        |
| S181A       | 0.6       | 0.5        |
| T182A       | 1.5       | 0.75       |
| L185A       | 2.2       | 6.0        |
| S           | 0.8       | 1.0        |
| V           | 1.0       | 0.5        |
| K186V       | 1.0       | 0.5        |
| L266A       | 1.0       | 1.5        |
| M271A       | 3.8       | 10         |
| N272A       | 3.2       | 10         |
| I275A       | 0.6       | 0.5        |
| V           | 0.7       | 0.5        |
| F104A/I275A | 2.4       | 1.0        |

Supplemental Figure 1

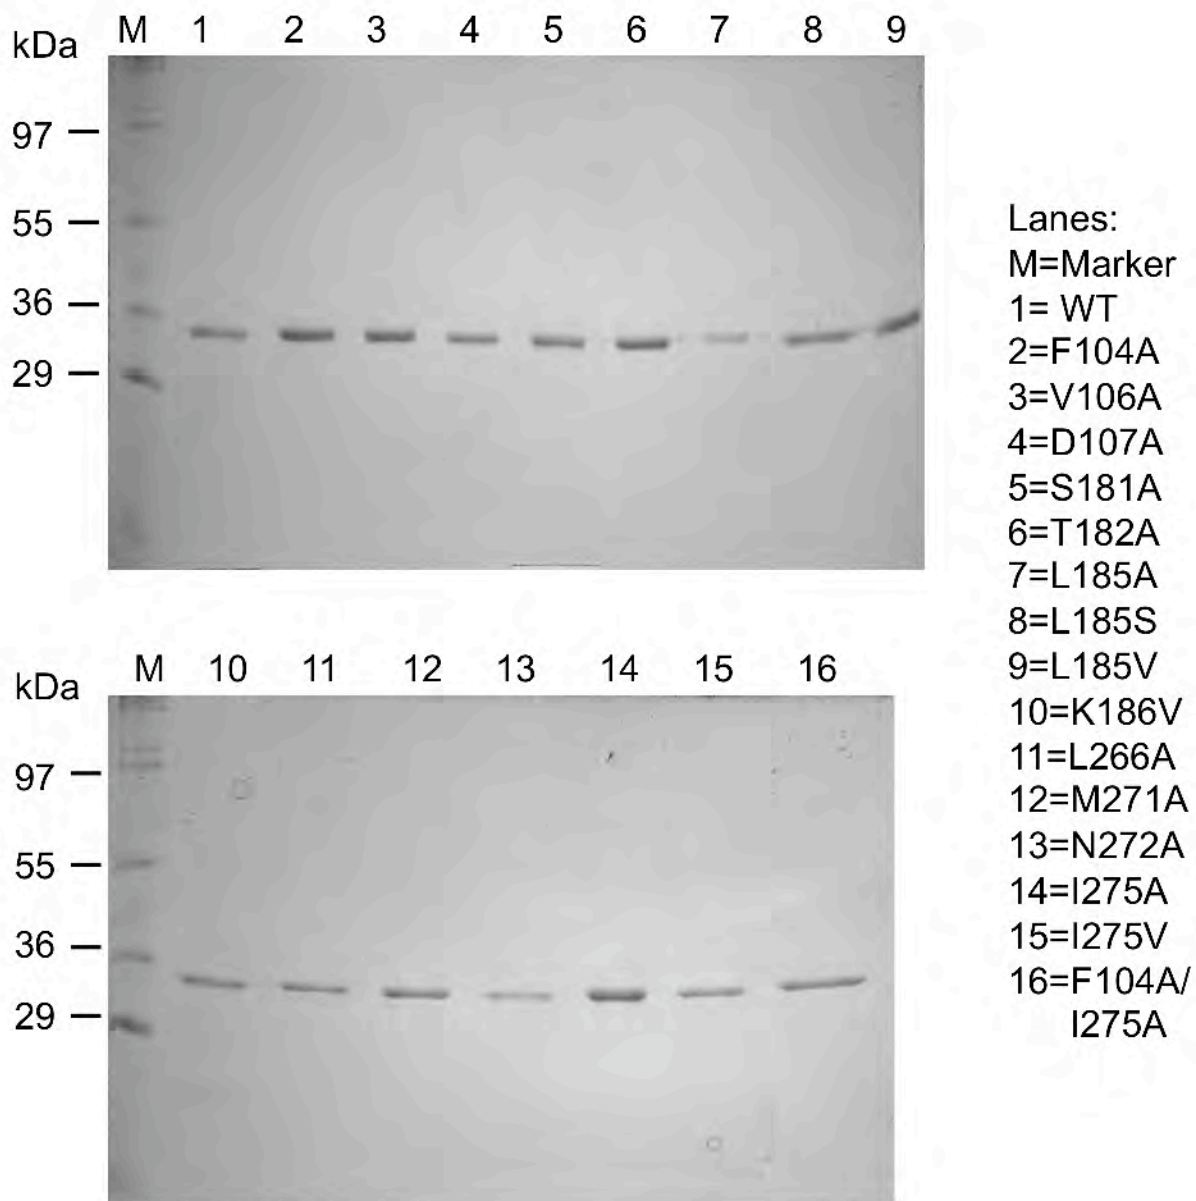

SUPPLEMENTAL FIGURE 1. **SDS-PAGE of purified SalR mutants.** About 1  $\mu$ g of Cobalt affinity-purified His-tagged SalR mutants were separated on 12 % SDS-polyacrylamide gels and stained with Coomassie blue.

Supplemental Figure 2

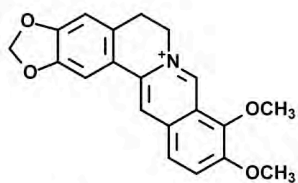

**Berberine**

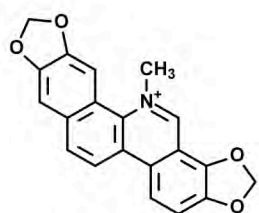

**Sanguinarine**

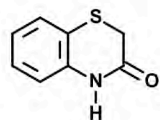

**2H-1,4-Benzothiazine-3(4H)-one**

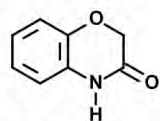

**2H-1,4-Benzoxazine-3(4H)-one**

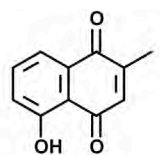

**Plumbagine**

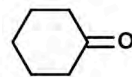

**Cyclohexanone**

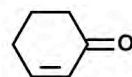

**2-Cyclohexen-1-one**

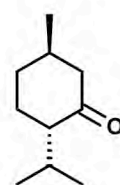

**(-)-Menthone**

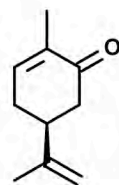

**(+)-Carvone**

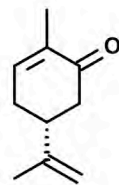

**(-)-Carvone**

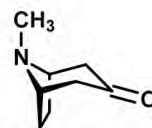

**Tropinone**

SUPPLEMENTAL FIGURE 2. **Substrates tested for enzyme specificity.**
